# Supplementary material for: Genetic Risk Scores Associated with Baseline Lipoprotein Subfraction Concentrations Do Not Associate with Their Responses to Fenofibrate
Source: PubMed Central journal article supplement (PMC4192626; doi:10.3390/biology3030536), 2014-08-25
Supplement: biology-03-00536-s001.pdf [file biology-03-00536-s001.pdf]

## Supplementary Information

**Table S1.** Initial SNP-phenotype associations with fasting NMR data.

| Rs Number                        | Locus                | Gene                       | ± <sup>a</sup> | MAF in GOLDN | F-Value | p     |
|----------------------------------|----------------------|----------------------------|----------------|--------------|---------|-------|
| <b>Small VLDL Concentration</b>  |                      |                            |                |              |         |       |
| rs10889353                       | 1p31.3               | <i>ANGPTL3</i>             | –              | 0.36         | 2.84    | 0.187 |
| rs10903129                       | 1p36.11              | <i>TMEM57</i>              | –              | 0.47         | 0.26    | 0.771 |
| rs11067392                       | 12q24.11             | <i>MVK/MMAB</i>            | –              | 0.06         | 0.01    | 0.932 |
| rs1109166                        | 16q22.1              | <i>LCAT</i>                | +              | 0.15         | 0.16    | 0.692 |
| rs11122490                       | 1q42.13              | <i>GALNT2</i>              | –              | 0.26         | 0.04    | 0.526 |
| rs12610185                       | 19p13.11             | <i>CILP2/PBX4/NCAN/SF4</i> | –              | 0.08         | 0.01    | 0.932 |
| rs1363232                        | 5q33.3               | <i>TIMD4/HAVCR1</i>        | –              | 0.32         | 1.04    | 0.309 |
| rs1393794                        | 11p11.2–<br>11p11.12 | <i>MADD/FOLH1/NR1H3</i>    | +              | 0.27         | 4.02    | 0.045 |
| rs157580                         | 19q13.32             | <i>APOC1-APOE</i>          | –              | 0.41         | 0.67    | 0.415 |
| rs1800775                        | 16q13                | <i>CETP</i>                | +              | 0.45         | 0       | 0.992 |
| rs328                            | 8p21.3               | <i>MADD/FOLH1/NR1H3</i>    | –              | 0.10         | 0.6     | 0.44  |
| rs646776                         | 1p13.3               | <i>CELSR2/PSRC1/SPRT1</i>  | –              | 0.20         | 1.98    | 0.16  |
| rs6511720                        | 19p13.2              | <i>LDLR</i>                | –              | 0.22         | 0.42    | 0.519 |
| rs676210                         | 2p24.1               | <i>APOB</i>                | –              | 0.22         | 6.46    | 0.011 |
| <b>Medium VLDL Concentration</b> |                      |                            |                |              |         |       |
| rs10889353                       | 1p31.3               | <i>ANGPTL3</i>             | –              | 0.36         | 3.12    | 0.028 |
| rs11974409                       | 7q11.23              | <i>MLXIPL</i>              | –              | 0.26         | 1.41    | 0.235 |
| rs1260326                        | 2p23.3               | <i>GCKR</i>                | +              | 0.41         | 1.62    | 0.203 |
| rs12797843                       | 11p11.2–<br>11p11.12 | <i>MADD/FOLH1/NR1H3</i>    | +              | 0.09         | 0.43    | 0.511 |
| rs1363232                        | 5q33.3               | <i>TIMD4/HAVCR1</i>        | –              | 0.32         | 0.53    | 0.467 |
| rs2304128                        | 19p13.11             | <i>CILP2/PBX4/NCAN/SF4</i> | –              | 0.08         | 1.03    | 0.311 |
| rs328                            | 8p21.3               | <i>MADD/FOLH1/NR1H3</i>    | –              | 0.1          | 4.01    | 0.046 |
| rs405509                         | 19q13.32             | <i>APOC1-APOE</i>          | –              | 0.48         | 0.33    | 0.568 |
| <b>Large VLDL Concentration</b>  |                      |                            |                |              |         |       |
| rs11974409                       | 7q11.23              | <i>MLXIPL</i>              | –              | 0.26         | 1.3     | 0.254 |
| rs1260326                        | 2p23.3               | <i>GCKR</i>                | +              | 0.41         | 3.83    | 0.051 |
| rs1363232                        | 5q33.3               | <i>TIMD4/HAVCR1</i>        | –              | 0.32         | 2.73    | 0.099 |
| rs2076530                        | 6p21.32              | <i>BTNL2</i>               | +              | 0.44         | 0.74    | 0.678 |
| <b>Large VLDL Concentration</b>  |                      |                            |                |              |         |       |
| rs2697920                        | 11p11.2–<br>11p11.12 | <i>MADD/FOLH1/NR1H3</i>    | –              | 0.38         | 1.29    | 0.257 |
| rs328                            | 8p21.3               | <i>MADD/FOLH1/NR1H3</i>    | –              | 0.1          | 0.54    | 0.463 |
| rs439401                         | 19q13.32             | <i>APOC1-APOE</i>          | –              | 0.63         | 0.24    | 0.628 |
| <b>VLDL Total Particles</b>      |                      |                            |                |              |         |       |
| rs10889353                       | 1p31.3               | <i>ANGPTL3</i>             | –              | 0.36         | 4.82    | 0.008 |
| rs1109166                        | 16q22.1              | <i>LCAT</i>                | +              | 0.15         | 0.05    | 0.826 |
| rs11122490                       | 1q42.13              | <i>GALNT2</i>              | –              | 0.26         | 1.17    | 0.28  |

Table S1. Cont.

| Rs Number                      | Locus                | Gene                        | ± <sup>a</sup> | MAF in GOLDN | F-Value | p       |
|--------------------------------|----------------------|-----------------------------|----------------|--------------|---------|---------|
| <b>VLDL Total Particles</b>    |                      |                             |                |              |         |         |
| rs1260326                      | 2p23.3               | <i>GCKR</i>                 | +              | 0.41         | 4.93    | 0.027   |
| rs12610185                     | 19p13.11             | <i>CILP2/PBX4/NCAN/SF4</i>  | −              | 0.08         | 1.16    | 0.281   |
| rs12797843                     | 11p11.2–<br>11p11.12 | <i>MADD/FOLH1/NR1H3</i>     | +              | 0.09         | 0.06    | 0.803   |
| rs1363232                      | 5q33.3               | <i>TIMD4/HAVCR1</i>         | −              | 0.32         | 2.72    | 0.099   |
| rs1800775                      | 16q13                | <i>CETP</i>                 | +              | 0.45         | 0.65    | 0.42    |
| rs328                          | 8p21.3               | <i>MADD/FOLH1/NR1H3</i>     | −              | 0.1          | 0.414   | 0.042   |
| rs439401                       | 19q13.32             | <i>APOC1-APOE</i>           | −              | 0.63         | 0.14    | 0.711   |
| rs646776                       | 1p13.3               | <i>CELSR2/PSRC1/SPRT1</i>   | −              | 0.20         | 1.86    | 0.173   |
| rs676210                       | 2p24.1               | <i>APOB</i>                 | −              | 0.22         | 11.46   | 0.001   |
| rs714052                       | 7q11.23              | <i>MLXIPL</i>               | −              | 0.13         | 7.3     | 0.007   |
| <b>VLDL diameter</b>           |                      |                             |                |              |         |         |
| rs11085270                     | 19p13.11             | <i>CILP2/PBX4/NCAN/SF4</i>  | +              | 0.22         | 3.06    | 0.081   |
| rs1260326                      | 2p23.3               | <i>GCKR</i>                 | +              | 0.41         | 0.32    | 0.574   |
| rs2279804                      | 5q33.3               | <i>TIMD4/HAVCR1</i>         | −              | 0.47         | 0.29    | 0.496   |
| rs2306813                      | 1q42.13              | <i>GALNT2</i>               | +              | 0.19         | 1.37    | 0.088   |
| rs676210                       | 2p24.1               | <i>APOB</i>                 | +              | 0.22         | 24.71   | <0.0001 |
| <b>Small LDL Concentration</b> |                      |                             |                |              |         |         |
| rs10769253                     | 11p11.2–<br>11p11.12 | <i>MADD/FOLH1/NR1H3</i>     | −              | 0.18         | 2.02    | 0.156   |
| rs10808546                     | 8q24.13              | <i>TRIB1</i>                | −              | 0.45         | 1.88    | 0.1708  |
| rs11974409                     | 7q11.23              | <i>MLXIPL</i>               | −              | 0.26         | 2.88    | 0.09    |
| rs1800588                      | 15q22.1              | <i>LIPC</i>                 | −              | 0.22         | 0.72    | 0.395   |
| rs1800775                      | 16q13                | <i>CETP</i>                 | +              | 0.45         | 0.78    | 0.378   |
| rs2271293                      | 16q22.1              | <i>LCAT</i>                 | −              | 0.12         | 1.16    | 0.173   |
| rs331                          | 8p21.3               | <i>MADD/FOLH1/NR1H3</i>     | −              | 0.26         | 0.71    | 0.401   |
| rs4731702                      | 7q32.2               | <i>KLF14</i>                | −              | 0.50         | 0.05    | 0.827   |
| rs4846904                      | 1q42.13              |                             | +              | 0.20         | 0.59    | 0.4435  |
| rs6065906                      | 20q13.12.B           | <i>PLTP</i>                 | +              | 0.15         | 0.36    | 0.551   |
| rs646776                       | 1p13.3               | <i>CELSR2/PSRC1/SPRT1</i>   | −              | 0.20         | 13.12   | 0.0003  |
| rs7307277                      | 12q24.31.B           | <i>CCDC92/DNAH10/ZNF664</i> | −              | 0.33         | 0.54    | 0.381   |
| rs780094                       | 2p23.3               | <i>GCKR</i>                 | +              | 0.40         | 4.48    | 0.083   |
| <b>Large LDL Concentration</b> |                      |                             |                |              |         |         |
| rs1535                         | 11q12.2              | <i>FADS1-3</i>              | −              | 0.36         | 5.98    | 0.015   |
| rs1713222                      | 2p24.1               | <i>APOB</i>                 | −              | 0.16         | 1.3     | 0.234   |
| rs1800588                      | 15q22.1              | <i>LIPC</i>                 | +              | 0.22         | 3.77    | 0.053   |
| rs1864163                      | 16q13                | <i>CETP</i>                 | −              | 0.24         | 2.64    | 0.105   |
| rs2083637                      | 8p21.3               | <i>MADD/FOLH1/NR1H3</i>     | +              | 0.27         | 4.44    | 0.036   |
| rs2271293                      | 16q22.1              | <i>LCAT</i>                 | +              | 0.12         | 0.78    | 0.257   |
| rs2957873                      | 11p11.2–<br>11p11.12 | <i>MADD/FOLH1/NR1H3</i>     | +              | 0.20         | 0.83    | 0.362   |

Table S1. Cont.

| Rs Number                      | Locus            | Gene                        | ± <sup>a</sup> | MAF in GOLDN | F-Value | p      |
|--------------------------------|------------------|-----------------------------|----------------|--------------|---------|--------|
| <b>Large LDL Concentration</b> |                  |                             |                |              |         |        |
| rs4803750                      | 19q13.32         | <i>APOC1-APOE</i>           | −              | 0.07         | 0.86    | 0.196  |
| rs4808206                      | 19p13.11         | <i>CILP2/PBX4/NCAN/SF4</i>  | +              | 0.16         | 0       | 0.978  |
| rs4810479                      | 20q13.12.B       | <i>PLTP</i>                 | −              | 0.21         | 0.01    | 0.927  |
| rs4846904                      | 1q42.13          | <i>GALNT2</i>               | −              | 0.20         | 1.78    | 0.182  |
| rs4939883                      | 18q21.1          | <i>LIPG</i>                 | −              | 0.21         | 0.78    | 0.283  |
| rs5744680                      | 5q13.3           | <i>HMGCR</i>                | +              | 0.39         | 1.82    | 0.258  |
| rs646776                       | 1p13.3           | <i>CELSR2/PSRC1/SPRT1</i>   | −              | 0.20         | 2.09    | 0.149  |
| rs6511720                      | 19p13.2          | <i>LDLR</i>                 | −              | 0.22         | 0.28    | 0.593  |
| rs714052                       | 7q11.23          | <i>MLXIPL</i>               | +              | 0.13         | 3.27    | 0.0711 |
| rs7706174                      | 5q33.3           | <i>TIMD4/HAVCR1</i>         | −              | 0.17         | 0.78    | 0.284  |
| rs873308                       | 1p36.11          | <i>TMEM57</i>               | −              | 0.48         | 2.6     | 0.108  |
| <b>LDL Total Particles</b>     |                  |                             |                |              |         |        |
| rs10779835                     | 1q42.13          | <i>GALNT2</i>               | +              | 0.61         | 0.3     | 0.586  |
| rs10903129                     | 1p36.11          | <i>TMEM57</i>               | −              | 0.47         | 2.39    | 0.3046 |
| rs1363232                      | 5q33.3           | <i>TIMD4/HAVCR1</i>         | −              | 0.32         | 0.065   | 0.419  |
| rs4731702                      | 7q32.2           | <i>KLF14</i>                | −              | 0.50         | 0.1     | 0.754  |
| rs506585                       | 2p24.1           | <i>APOB</i>                 | −              | 0.22         | 2.47    | 0.037  |
| rs6065906                      | 20q13.12.B       | <i>PLTP</i>                 | +              | 0.15         | 0.06    | 0.811  |
| rs646776                       | 1p13.3           | <i>CELSR2/PSRC1/SPRT1</i>   | −              | 0.20         | 12.43   | 0.001  |
| rs6511720                      | 19p13.2          | <i>LDLR</i>                 | −              | 0.22         | 2.46    | 0.117  |
| rs6982636                      | 8q24.13          | <i>TRIB1</i>                | −              | 0.48         | 1.04    | 0.308  |
| rs7307277                      | 12q24.31.B       | <i>CCDC92/DNAH10/ZNF664</i> | −              | 0.33         | 0.05    | 0.999  |
| rs739461                       | 19p13.11         | <i>CILP2/PBX4/NCAN/SF4</i>  | +              | 0.28         | 0.03    | 0.871  |
| rs780094                       | 2p23.3           | <i>GCKR</i>                 | +              | 0.40         | 5.01    | 0.409  |
| <b>LDL Diameter</b>            |                  |                             |                |              |         |        |
| rs10808546                     | 8q24.13          | <i>TRIB1</i>                | +              | 0.45         | 2.04    | 0.1537 |
| rs10850435                     | 12q24.11         | <i>MVK/MMAB</i>             | −              | 0.49         | 0.1     | 0.754  |
| rs1800588                      | 15q22.1          | <i>LIPC</i>                 | +              | 0.22         | 4.49    | 0.034  |
| rs1800775                      | 16q13            | <i>CETP</i>                 | +              | 0.45         | 3.46    | 0.064  |
| rs2083637                      | 8p21.3           | <i>MADD/FOLH1/NR1H3</i>     | +              | 0.27         | 2.76    | 0.097  |
| rs2271293                      | 16q22.1          | <i>LCAT</i>                 | +              | 0.12         | 1.48    | 0.123  |
| rs2957873                      | 11p11.2–11p11.12 | <i>MADD/FOLH1/NR1H3</i>     | +              | 0.20         | 0.76    | 0.383  |
| rs4846904                      | 1q42.13          | <i>GALNT2</i>               | −              | 0.20         | 2.27    | 0.133  |
| rs4939883                      | 18q21.1          | <i>LIPG</i>                 | −              | 0.21         | 0.53    | 0.439  |
| rs6065906                      | 20q13.12.B       | <i>PLTP</i>                 | −              | 0.15         | 1.19    | 0.278  |
| rs673548                       | 2p24.1           | <i>APOB</i>                 | +              | 0.22         | 0.2     | 0.537  |
| rs7307277                      | 12q24.31.B       | <i>CCDC92/DNAH10/ZNF664</i> | +              | 0.33         | 1.11    | 0.137  |
| rs7706174                      | 5q33.3           | <i>TIMD4/HAVCR1</i>         | −              | 0.17         | 0.96    | 0.167  |
| rs7777102                      | 7q11.23          | <i>MLXIPL</i>               | +              | 0.21         | 4.48    | 0.035  |

Table S1. Cont.

| Rs Number                       | Locus                | Gene                             | ± <sup>a</sup> | MAF in GOLDN | F-Value | p      |
|---------------------------------|----------------------|----------------------------------|----------------|--------------|---------|--------|
| <b>LDL Diameter</b>             |                      |                                  |                |              |         |        |
| rs780094                        | 2p23.3               | <i>GCKR</i>                      | –              | 0.40         | 1.36    | 0.221  |
| <b>Small HDL Concentration</b>  |                      |                                  |                |              |         |        |
| rs1109166                       | 16q22.1              | <i>LCAT</i>                      | +              | 0.15         | 2.86    | 0.091  |
| rs11974409                      | 7q11.23              | <i>MLXIPL</i>                    | –              | 0.26         | 4.87    | 0.028  |
| rs1260326                       | 2p23.3               | <i>GCKR</i>                      | +              | 0.41         | 0.31    | 0.578  |
| rs1532085                       | 15q22.1              | <i>LIPC</i>                      | –              | 0.37         | 3.92    | 0.048  |
| rs2058804                       | 12q24.11             | <i>MVK/MMAB</i>                  | +              | 0.49         | 0       | 0.965  |
| rs2163813                       | 19p13.11             | <i>CILP2/PBX4/NCAN/SF4</i>       | +              | 0.72         | 0       | 0.989  |
| rs3856637                       | 3q22.3               | <i>PCCB</i>                      | +              | 0.72         | 0.69    | 0.676  |
| rs3924486                       | 1p36.11              | <i>TMEM57</i>                    | –              | 0.47         | 0.04    | 0.838  |
| rs4752904                       | 11p11.2–<br>11p11.12 | <i>MADD/FOLH1/NR1H3</i>          | –              | 0.43         | 0.4     | 0.53   |
| rs4847022                       | 1q42.13              | <i>GALNT2</i>                    | +              | 0.24         | 2.31    | 0.139  |
| rs518181                        | 11q23.3              | <i>APOA1-A5</i>                  | +              | 0.36         | 5.97    | 0.015  |
| rs6065906                       | 20q13.12.B           | <i>PLTP</i>                      | +              | 0.15         | 3.47    | 0.063  |
| <b>Medium HDL Concentration</b> |                      |                                  |                |              |         |        |
| rs10779835                      | 1q42.13              | <i>GALNT2</i>                    | –              | 0.61         | 1.57    | 0.211  |
| rs174537                        | 11q12.2              | <i>FADS1-3</i>                   | +              | 0.36         | 10.17   | 0.002  |
| rs1800588                       | 15q22.1              | <i>LIPC</i>                      | –              | 0.22         | 0.3     | 0.587  |
| rs2228603                       | 19p13.11             | <i>CILP2/PBX4/NCAN/SF4</i>       | –              | 0.08         | 0       | 0.946  |
| rs255052                        | 16q22.1              | <i>LCAT</i>                      | –              | 0.15         | 1.1     | 0.139  |
| rs2909207                       | 17q24.2.B            | <i>WIP1I</i>                     | +              | 0.23         | 0.83    | 0.281  |
| rs3905000                       | 9q31.1               | <i>ABCA1</i>                     | +              | 0.14         | 0.04    | 0.916  |
| rs405509                        | 19q13.32             | <i>APOC1-APOE</i>                | –              | 0.48         | 1.16    | 0.282  |
| rs4073054                       | 1q23.3               | <i>APOA</i>                      | –              | 0.38         | 0.72    | 0.234  |
| rs4704810                       | 5q33.3               | <i>TIMD4/HAVCR1</i>              | +              | 0.43         | 0.92    | 0.337  |
| <b>Large HDL Concentration</b>  |                      |                                  |                |              |         |        |
| rs102275                        | 11q12.2              | <i>FADS1-3</i>                   | –              | 0.36         | 9.07    | 0.003  |
| rs1800588                       | 15q22.1              | <i>LIPC</i>                      | +              | 0.22         | 13.20   | 0.0003 |
| rs1800775                       | 16q13                | <i>CETP</i>                      | +              | 0.45         | 8.18    | 0.004  |
| rs2058804                       | 12q24.11             | <i>MVK/MMAB</i>                  | –              | 0.49         | 0.64    | 0.422  |
| rs2957873                       | 11p11.2–<br>11p11.12 | <i>MADD/FOLH1/NR1H3</i>          | +              | 0.20         | 0.24    | 0.622  |
| rs331                           | 8p21.3               | <i>MADD/FOLH1/NR1H3</i>          | +              | 0.26         | 0.27    | 0.61   |
| rs4846904                       | 1q42.13              | <i>GALNT2</i>                    | –              | 0.20         | 4.46    | 0.035  |
| rs4939883                       | 18q21.1              | <i>LIPG</i>                      | –              | 0.21         | 0.32    | 0.73   |
| rs4986970                       | 16q22.1              | <i>LCAT</i>                      | –              | 0.04         | 0.34    | 0.559  |
| rs6065906                       | 20q13.12.B           | <i>PLTP</i>                      | –              | 0.15         | 8.80    | 0.003  |
| rs7307277                       | 12q24.31.B           | <i>CCDC92/DNAH10/ZN<br/>F664</i> | +              | 0.33         | 2.17    | 0.11   |
| <b>HDL Total Particles</b>      |                      |                                  |                |              |         |        |
| rs10779835                      | 1q42.13              | <i>GALNT2</i>                    | +              | 0.61         | 1.67    | 0.197  |
| rs1109166                       | 16q22.1              | <i>LCAT</i>                      | +              | 0.15         | 4.17    | 0.042  |
| rs1260326                       | 2p23.3               | <i>GCKR</i>                      | +              | 0.41         | 0.52    | 0.46   |

Table S1. Cont.

| Rs Number                  | Locus                | Gene                          | ± <sup>a</sup> | MAF in GOLDN | F-Value | p      |
|----------------------------|----------------------|-------------------------------|----------------|--------------|---------|--------|
| <b>HDL Total Particles</b> |                      |                               |                |              |         |        |
| rs1818702                  | 12q23.2              | <i>intergenic, ASCL1, PAH</i> | –              | 0.31         | 1.17    | 0.895  |
| rs2238675                  | 19p13.11             | <i>CILP2/PBX4/NCAN/SF4</i>    | –              | 0.14         | 0.77    | 0.38   |
| rs518181                   | 11q23.3              | <i>APOA1-A5</i>               | +              | 0.36         | 0.49    | 0.486  |
| rs6065906                  | 20q13.12.B           | <i>PLTP</i>                   | +              | 0.15         | 0.67    | 0.414  |
| rs7499892                  | 16q13                | <i>CETP</i>                   | –              | 0.16         | 8.41    | 0.004  |
| <b>HDL diameter</b>        |                      |                               |                |              |         |        |
| rs10850435                 | 12q24.11             | <i>MVK/MMAB</i>               | –              | 0.49         | 0.9     | 0.344  |
| rs1260326                  | 2p23.3               | <i>GCKR</i>                   | –              | 0.41         | 0.13    | 0.722  |
| rs12610185                 | 19p13.11             | <i>CILP2/PBX4/NCAN/SF4</i>    | +              | 0.08         | 1.14    | 0.285  |
| rs1535                     | 11q12.2              | <i>FADS1-3</i>                | –              | 0.36         | 8.13    | 0.004  |
| rs1800588                  | 15q22.1              | <i>LIPC</i>                   | +              | 0.22         | 13.19   | 0.0003 |
| rs1800775                  | 16q13                | <i>CETP</i>                   | +              | 0.45         | 4.68    | 0.031  |
| rs2957873                  | 11p11.2–<br>11p11.12 | <i>MADD/FOLH1/NR1H3</i>       | +              | 0.20         | 0.2     | 0.65   |
| rs331                      | 8p21.3               | <i>MADD/FOLH1/NR1H3</i>       | +              | 0.26         | 2.23    | 0.126  |
| rs4731702                  | 7q32.2               | <i>KLF14</i>                  | +              | 0.50         | 0.03    | 0.86   |
| rs4846908                  | 1q42.13              | <i>GALNT2</i>                 | +              | 0.43         | 2.23    | 0.136  |
| rs4939883                  | 18q21.1              | <i>LIPG</i>                   | –              | 0.21         | 0.37    | 0.499  |
| rs4986970                  | 16q22.1              | <i>LCAT</i>                   | –              | 0.04         | 2.11    | 0.147  |
| rs6065906                  | 20q13.12.B           | <i>PLTP</i>                   | –              | 0.15         | 4.72    | 0.03   |
| rs7307277                  | 12q24.31.B           | <i>CCDC92/DNAH10/ZNF664</i>   | +              | 0.33         | 1.37    | 0.124  |

<sup>a</sup> ± signifies the direction of effect in the original GWAS [1].

**Table S2.** Associations between a genetic risk score associated with baseline NMR measures, and the response of those NMR measures to a 3-week fenofibrate trial, stratified by baseline triglyceride levels.

| NMR Measure               | GRS-Phenotype Associations with Fenofibrate Response |          |                                                  |          |
|---------------------------|------------------------------------------------------|----------|--------------------------------------------------|----------|
|                           | Baseline Fasting TG <150 mg/dL<br><i>n</i> = 544     |          | Baseline Fasting TG ≥150 mg/dL<br><i>n</i> = 248 |          |
|                           | F                                                    | <i>p</i> | F                                                | <i>p</i> |
| Small VLDL concentration  | 0.22                                                 | 0.64     | 0.27                                             | 0.61     |
| Medium VLDL concentration | 0.22                                                 | 0.64     | 0.93                                             | 0.34     |
| Large VLDL concentration  | 1.38                                                 | 0.24     | 0.09                                             | 0.76     |
| VLDL total particles      | 0.61                                                 | 0.44     | 1.21                                             | 0.27     |
| VLDL diameter             | 1.59                                                 | 0.21     | 1.13                                             | 0.29     |
| Small LDL concentration   | 0.62                                                 | 0.43     | 0.10                                             | 0.75     |
| Large LDL concentration   | 1.89                                                 | 0.17     | 1.30                                             | 0.26     |
| LDL total particles       | 0.05                                                 | 0.82     | 0.22                                             | 0.64     |
| LDL diameter              | 0.57                                                 | 0.45     | 1.24                                             | 0.27     |
| Small HDL concentration   | 1.41                                                 | 0.24     | 0.22                                             | 0.64     |
| Medium HDL concentration  | 5.64                                                 | 0.02     | 0.77                                             | 0.39     |
| Large HDL concentration   | 0.20                                                 | 0.66     | 1.16                                             | 0.28     |
| HDL total particles       | 0.97                                                 | 0.33     | 0.80                                             | 0.37     |
| HDL diameter              | 0.01                                                 | 0.92     | 6.57                                             | 0.01     |

## Reference

1. Chasman, D.I.; Paré, G.; Mora, S.; Hopewell, J.C.; Peloso, G.; Clarke, R.; Cupples, L.A.; Hamsten, A.; Kathiresan, S.; Mälarstig, A.; *et al.* Forty-three loci associated with plasma lipoprotein size, concentration, and cholesterol content in genome-wide analysis. *PLoS Genet.* **2009**, *5*, e1000730.

© 2014 by the authors; licensee MDPI, Basel, Switzerland. This article is an open access article distributed under the terms and conditions of the Creative Commons Attribution license (<http://creativecommons.org/licenses/by/3.0/>).
